1 Running Head: Demography of a tropical Indian bird

2

3

4 Title: Demographic changes of a tropical understory bird in naturally patchy montane habitats in  
5 southern India.

6

7 V. V. Robin<sup>1,4</sup>, James E. Hines<sup>2</sup>, James D. Nichols<sup>2</sup>, Madhusudan Katti<sup>3</sup> and Anindya Sinha<sup>1</sup>

8

9 <sup>1</sup>National Institute of Advanced Studies, Indian Institute of Science Campus, Bangalore 560012

10 <sup>2</sup>USGS Patuxent Wildlife Research Center, Laurel, MD 20708-4017

11 <sup>3</sup>Dept. of Biology, California State University, Fresno, USA

12 <sup>4</sup>National Centre for Biological Sciences, TIFR, GKVK campus, Bangalore

13

## 14 **ABSTRACT**

15 The occurrence, density and survival of a species often depend on various aspects of the habitat  
16 that it occupies including patch size and disturbance. The demography of most threatened  
17 tropical species largely remain unstudied but could provide valuable information about their  
18 biology and insights for their conservation. Our study examined the effect of patch size and  
19 disturbance on different demographic parameters of an understory, threatened, endemic bird, the  
20 white-bellied shortwing in the tropical biodiversity hotspot of the Western Ghats in India. We  
21 sampled eight plots on a sky-island using mist-nets for four years in a ‘Robust design’ mark-  
22 recapture framework. Based on model selection using AIC values, the model with survival as a  
23 function of disturbance fits the data better than models with abundance or with these parameters  
24 modeled as functions of forest patch size. Shortwing density and sex ratio were not different  
25 across forest patch sizes or differing disturbance regimes. However, the survival rate of the  
26 species significantly decreased with increasing disturbance but was not related to forest patch  
27 size. Our study is possibly the first to provide critical baseline information on the demography of  
28 a tropical understory species from this region.

## 29 **KEYWORDS**

30 Shortwing, Western Ghats, demography, survival rate, disturbance, birds, sky island, mark-  
31 recapture, Robust design, India, Shola forest

## 32 **INTRODUCTION**

33 One of the most important conservation challenges of our times is the anthropogenic  
34 fragmentation of contiguous habitat to form disjunct patches. In this scenario, it has often been  
35 argued that preserving large tracts of habitats is essential for the long-term survival of species

36 (Diamond et al. 1987, Beier et al. 2002) though smaller patches could also contribute in this  
37 regard (e.g., Githiru and Lens 2006a). In contrast to habitat loss, disturbance unobtrusively  
38 affects the demography of different species, especially understory insectivorous birds that are  
39 extremely sensitive to disturbances in forest structure (Thiollay 1999, Sekercioglu et al. 2002).

40 The quality of the habitat can affect critical demographic parameters of a population in various  
41 ways. Better-quality areas, for example, can support higher densities of a species due to the  
42 greater availability of resources leading to smaller territories (e.g., Githiru and Lens 2006b).  
43 Species that are sensitive to fragmentation can also occur less commonly in sub-optimal habitats  
44 such as small degraded fragments (e.g., Zanette et al. 2000). Conservation managers, in fact,  
45 often use density as a surrogate for the health of a population (e.g., Irwin et al. 2005). However,  
46 the rate of turnover in suboptimal habitats can be higher than that in better-quality patches (e.g.,  
47 Zanette 2001).

48 Apart from survival rates and population densities, one of the important demographic factors is  
49 adult sex ratio (ASR), an indicator of a population's trajectory, behavioral ecology and its  
50 conservation status (reviewed in Donald 2007). ASR is often known to correlate with population  
51 trends or habitat quality (Zanette 2001) and has already been used as an indicator of population  
52 status in the management of some mammals (Donald 2007). Most research providing  
53 information on survival rates and population densities have, however, come from temperate  
54 regions.

55 Tropics, in general, are thought to be inhabited by species that have a "slow" life-history strategy,  
56 where high survival rates in optimal patches generate only few openings for new recruits, leading  
57 to low individual turnover rates (e.g., Morton and Stutchbury 2000). While there have been a few

58 studies estimating survival rates, particularly using mark-recapture methods, from the tropics  
59 (e.g., Karr et al. 1990, Brawn et al. 1995, Brawn et al. 1999, Githiru and Lens 2006b), there have  
60 been no studies from the Asian tropics, though they host several global biodiversity hotspots and  
61 their endemic species.

62 The Shola forests in the high-elevation sky islands of the Western Ghats consist of naturally  
63 occurring patches of forests that range from 0.1 ha to thousands of hectares, with this patchiness  
64 originating from a combination of factors including the geography of the landscape, wind  
65 direction and rainfall (Caner et al. 2007). Such patchiness is known to affect various aspects of  
66 species demography in both naturally and artificially fragmented landscapes (e.g., Dooley Jr and  
67 Bowers 1998). We investigated the effect of such patchiness and habitat disturbance or  
68 degradation on the threatened (BirdLife International 2001), endemic, understory insectivorous  
69 bird, the white-bellied shortwing *Brachypteryx major* (Robin et al. 2010), also known as white-  
70 bellied blue robin. Specifically, we examined the effect of patch size and disturbance on (a) the  
71 population density, (b) survival and (c) sex ratios of shortwing individuals in our study patches.

## 72 **METHODS**

### 73 *Study area and design*

74 This study was conducted in the Grasshills National Park, located within one of the sky-islands  
75 of the Western Ghats, from 2003 to 2007. This region, lying on a high-elevation plateau, ranging  
76 from 1400 m to 2400 m above mean sea level (a.s.l), has an undulating topography in a matrix of  
77 natural patches of forests and grasslands (described in Shanker and Sukumar 1998).

78 We established eight study plots in the Park, at an elevation of 1450 m to 1600 m a.s.l. In one  
79 large patch of forest (> 2500 ha), we laid four plots (Plots A to D) of 2.5 ha each, along a

80 disturbance gradient. Disturbance in this landscape resulted entirely from anthropogenic  
81 activities, such as the collection of fuelwood. This was subjectively quantified (see below) in  
82 different areas before the selection of plots. We selected Plots A to D with a gradient of  
83 disturbance decreasing from Plot A to Plot C and with Plot D being an undisturbed plot. We also  
84 chose four small, independent, undisturbed patches (Plots E to H; 1.6, 1.1, 0.6 and 0.6 ha in size  
85 respectively), where each patch formed a separate plot. Plots E to H were selected such that they  
86 would be close to one another and were also the patches closest to the large patch (Plots A to D).  
87 This design was adopted to detect any metapopulation-level inter-patch movement, as well as to  
88 include patches that varied in size. Note that this selection of study plots, limited by its natural  
89 availability, permits some inference about relationships involving disturbance in large  
90 continuous habitats, and about relationships involving patch size in relative undisturbed areas,  
91 but not inferences about the potential interaction of disturbance and patch size.

## 92 **Trapping design**

93 Mist-nets, 12 m × 2 m, at a net density of 10 nets per hectare in each plot, were kept open from  
94 the break of dawn (0550 – 0600) for five hours each day, for three consecutive days to capture  
95 birds. Each captured bird was tagged with numbered metal bands. The study was designed to be  
96 conducted according to Pollock's (Pollock 1982) Robust Design where primary sampling periods  
97 (five) each include multiple secondary sampling periods (three). This design assumes that the  
98 population is 'open' to immigration, emigration, births and mortality across the four consecutive  
99 years (i.e. five primary sampling occasions) in our study while it is 'closed' across the three days  
100 of secondary sampling occasions within each year. This allowed us to compute the survival rate  
101 of individuals in each plot across the primary sampling periods and estimate abundance in the  
102 secondary sampling periods.

### 103 **Density and survival analysis**

104 Two plot-specific measures, used as covariates of survival rate and abundance, were plot size (a  
105 continuous variable, measured in ha) and disturbance category (a categorical variable). The plots  
106 were classified into four qualitative disturbance categories, scaling from 0 (undisturbed) to 4  
107 (highly disturbed), based on the number of people encountered, number of cut stems and  
108 openness of the canopy.

109 From the capture data from each plot, we constructed individual capture histories with the ‘1’s  
110 indicating captures and ‘0’s indicating no captures on each sampling occasion during each year.  
111 Initially, we had planned to use multistate capture-recapture models in order to estimate  
112 movement among patches, but the observed numbers of movements was so small (see below)  
113 that we instead used single-site models. All juveniles and sub-adults were removed from the  
114 analysis. Pollock’s Robust Design originally used closed population models to estimate  
115 abundance and the traditional Cormack-Jolly-Seber model (CJS) to estimate survival. The closed  
116 population models include estimators of capture probability and abundance that are robust to  
117 heterogeneity in detection probability while the CJS model includes survival estimators that are  
118 robust to this heterogeneity. Hence, Pollock’s Robust Design provides a suitable framework for  
119 estimating both survival and abundance. Kendall et al. (1995) later developed a full-likelihood  
120 framework that modeled within- and between-period information simultaneously, permitting the  
121 use of reduced parameterizations. We used the program MARK (White and Burnham 1999) to  
122 analyze the data using this integrated approach. It should be noted that here ‘survival’ is really  
123 “apparent” survival, the complement consisting of mortality as well as permanent emigration,  
124 which cannot be separated in this analysis. In the different models, capture and recapture  
125 probabilities were modeled as either constant or variable across secondary periods and as

126 variable across primary periods. Individual heterogeneity in capture probability was included  
127 using a 2-point mixture (Pledger 2000), which was allowed to vary across the years. Survival,  
128 similarly, was modeled as either constant or variable across the four intervals, and/or as differing  
129 between study plots. Temporary emigration was modeled as Markovian ( $\gamma'$ ,  $\gamma''$ ), random ( $\gamma' =$   
130  $\gamma''$ ), or absent ( $\gamma' = \gamma'' = 0$ ) (Kendall et al. 1997). Additionally, we modeled survival probabilities  
131 as functions of patch size and disturbance using the design matrix to specify linear-logistic  
132 models. The effects of patch size and disturbance on survival were modeled as interacting with  
133 temporal variation or as additive to temporal variation. In all, our candidate set consisted of 39  
134 models. The performance of different models was assessed based on the lowest Akaike  
135 Information Criterion (AIC) value. Density was estimated by calculating the effective sampling  
136 area by adding a strip width equal to half the average territory diameter to the sides of a plot  
137 when similar vegetation continued on that side (Wilson and Anderson 1985).

### 138 **Molecular sexing and sex determination**

139 The sexually monomorphic shortwing was sexed using molecular methods with standard primers,  
140 P2/P8 (Griffiths et al. 1998) and using a Discriminant Function Analysis (DFA) based on  
141 morphometric measurements of wing, tail and beak. Sex was assigned for 91 different  
142 individuals of the total 116 captured in this study (described in Robin et al. 2011). Some  
143 individuals (25) from across different plots and years remained unsexed and were not used in this  
144 analysis as they were without both genetic samples and a complete set of morphological  
145 measurements for the DFA to predict their sex. We calculated the sex ratio as the proportion of  
146 females in the plot. We combined sex data from all small plots and denoted this combined group  
147 as 'S' as the small plots E, F, G and H had very few individuals, with some years even  
148 characterized by single individuals,. We then examined year- and plot-wise breakdowns of sex

149 ratios and compared them using the Kruskal-Wallis chi-square test in the statistical programming  
150 language R (R Development Core Team 2011).

## 151 **RESULTS**

### 152 **Captures and movement**

153 We captured 116 individual adult Shortwings across the four years of sampling. We detected  
154 only two instances of movement during the entire study period, one individual from Plot B to A,  
155 the most disturbed plots, and another between two small patches (G and H). We were unable to  
156 detect any regular patterns of movement across any other plots during this study period.

### 157 **Density and survival rate**

158 Models with survival varying as a function of disturbance received the greatest support (AICc  
159 weight 0.95985) from the data of all 39 models tested, performing better than models that  
160 included plot size (AICc weight 0.22108, Appendix 1). In this model, initial capture probability  
161 was constant each year within a season but varied across years, while recapture probability was  
162 constant within and across years (Appendix1). Parameter estimates indicated that there was  
163 severe trap shyness in the birds, as the estimated recapture probability ( $0.21 \pm 0.03$  SE) was  
164 much lower than the capture probabilities in different years ( $0.45 \pm 0.04$ ,  $0.62 \pm 0.05$ , 1- SE  
165 not estimable). Temporary emigration was assumed to be random (Kendall et al. 1997) in the  
166 highest ranked models.

167 The mean population density  $\pm$  SE across all plots was  $2.8 \pm 0.37$  birds per ha. The abundance  
168 estimates varied across years and across plots, and showed that the large patch had a higher  
169 abundance of birds than did the small plots. The undisturbed plot had the highest abundance  
170 estimate, while all small patches had low abundance estimates. The population density estimates



171 (Figure 1), however, did not show evidence of a difference in density between plots based either  
172 on disturbance or size. The temporal variability in the density of the small patches still appeared  
173 to be higher than that of the plots in the large patch. Plot C, with very little disturbance, had the  
174 lowest estimated density of shortwings. The arithmetic mean survival of the population was  $0.58$   
175  $\pm 0.07$ , which indicated that over half the individuals from the previous year survived to the next  
176 year. Survival rate was a function of disturbance in the best model (Figure 2), with disturbed  
177 plots having significantly lower survival rates; Plot A, with the highest disturbance level, had the  
178 lowest survival rate.

### 179 **Adult sex ratio**

180 The overall sex ratio (proportion females) of the entire shortwing population that was sampled  
181 across different plots over all years was male-biased (0.44). However, a closer inspection of the  
182 data, plot- and year-wise, showed that, barring a few years, the most disturbed plot (A) appeared  
183 to be more female-biased than were less disturbed plots (Figure 3). This pattern, however, was  
184 not significant over all years (Kruskal-Wallis chi-square = 2.7,  $df = 2$ ,  $p = 0.26$ ).

## 185 **DISCUSSION**

### 186 *Density*

187 In general, it is expected that for understory insectivorous birds, fragmented and otherwise sub-  
188 optimal habitats harbor a lower density of individuals (e.g., Zanette et al. 2000) compared to the  
189 largest and least disturbed fragments (e.g., Githiru and Lens 2006b). The white-bellied shortwing  
190 is a species that is highly specific to this habitat and currently considered threatened due to  
191 habitat loss. Our results show that there was no consistent difference in shortwing densities  
192 across different patch sizes or degrees of disturbance. However, there was a marginally higher  
193 estimated density (4.54 individuals/ha) and the highest estimated abundance (14 individuals) of

194 shortwings in the undisturbed plot of the large patch (Plot D). This pattern is similar to that  
195 obtained in a study of the white-starred robin, another tropical passerine (Githiru and Lens  
196 2006b). The failure to detect any significant effect of disturbance on shortwing density could be  
197 because population density is not sensitive to the changes we are measuring. The lack of  
198 baseline data on this species or data on other similar species from this region hinders any further  
199 conclusions.

200 There is very little information on bird densities from the Western Ghats ., with Sridhar (e.g.,  
201 Raman and Sukumar 2002, Sridhar 2005) being the only study with comparable data. This study  
202 used point-counts to estimate bird densities in an area that overlapped with one of our study plots  
203 (Plot B) during the same study period. The estimated shortwing density of 0.30/ha in one  
204 sampling season was approximately ten-fold lower than our estimate for the same year ( $3.04 \pm$   
205  $0.5$ ) or that averaged over five years ( $2.6 \pm 0.4$ ). This could be because exclusively understory  
206 species like the shortwing are inherently difficult to detect in the dense evergreen forest  
207 understory, the same reason why the species may have been recorded so few times over the last  
208 century (2005).

### 209 *Survival rates in small patches*

210 Surprisingly, forest patch size did not affect survival more than did disturbance although the  
211 small forest patches were actually very small ( $< 1$  ha). Other studies on similar species such as  
212 the white-starred robin (Robin and Sukumar 2002) in Africa also failed to detect an effect of  
213 forest patch size on survival although their smallest patch was three times larger (3ha) than that  
214 of this study. We believe that the high survival rate in small patches may, once again, be because  
215 Shola forest species such as shortwings are adapted to some level of patchiness in the landscape,  
216 and individuals consistently persisted in these patches over years. Ancillary data (Robin pers.

217 obs.) indicate that shortwings were using these small patches not just for foraging but also for  
218 nesting and breeding, indicating the important role that small patches of natural forest play in the  
219 biology and survival of species such as the shortwing.

#### 220 *Survival in disturbed areas*

221 We found that habitat disturbance was associated with lowered survival rates of shortwings. Our  
222 most disturbed plot (A) had, in fact the lowest apparent survival rate of this bird over the entire  
223 study period. This could be due to higher mortality rates from predation (Githiru and Lens  
224 2006a), higher levels of permanent emigration, or because these areas are used by a larger  
225 number of transients (Gibbs 1991) as has been demonstrated in other tropical regions (Perret et al.  
226 2003). Other studies that have similarly demonstrated higher turnover of individuals in such  
227 suboptimal habitats (Johnston et al. 1997). As our data was not sufficient to include transience in  
228 our model, we are at present working towards assessing between-patch movement with genetic  
229 tools.

#### 230 *Adult sex ratios*

231 Adult sex ratios (ASR) in wild birds remain very poorly described, though skewed sex ratios are  
232 common in the wild (eg. Zann 2001). Most studies have found male-biased sex ratios in birds  
233 while female-skewed ASR appear to be the most common pattern in mammals. We found  
234 female-biased ASR in some of our study plots, particularly the most disturbed plot, a rare pattern  
235 in birds, having been recorded in only 19 studies on 14 species (9.5% of all studies) so far  
236 (reviewed in Donald 2007). Given the generally balanced offspring sex ratio, a skewed ASR can  
237 only be explained by higher mortality or dispersal of one of the sexes. Our limited data, with few  
238 individuals in each plot, do not permit us to model the effects of transience and sex-specific  
239 survival though we plan to do this in the future with additional sampling.

240 This study has provided evidence that a tropical understory insectivore is adversely affected by  
241 habitat disturbance more than by habitat patchiness. Population density did not reflect  
242 disturbance effects but survival rate and adult sex ratios were relatively more sensitive to  
243 disturbance. Although abundance and population density continue to be used as variables that  
244 inform many conservation measures, it appears from our study that other demographic  
245 parameters such as survival and adult sex ratio, though less easy to measure, could be more  
246 sensitive to habitat disturbance and quality. Anthropogenic habitat fragmentation is conspicuous  
247 and has attracted much attention from conservation biologists for its negative effects on  
248 population dynamics. In species that have evolved in patchy habitats, where fragmentation  
249 predates human influence, more subtle habitat disturbance may impact the survival of such  
250 species much more than would larger-scale fragmentation.

## 251 **ACKNOWLEDGEMENT**

252 We would like to thank the Tamil Nadu Forest Department for permits and the Ministry of  
253 Environment and Forests, Government of India for funding and permits, National Institute for  
254 Advanced Studies for support with logistics. D. Jathanna helped with considerable comments  
255 and suggestions on this manuscript. A part of the analysis was done while supported by an award  
256 from College of Science and Mathematics, California State University, Fresno and with travel  
257 support from Patuxent Wildlife Research Centre. We thank R. Nandini, D. Venugopal, E. Vitte,  
258 S. Rao, Loganathan, Ramesh, Senthil and Karuppuswamy and Grasshills field staff for help on  
259 field.

## 260 **REFERENCES**

261 Beier, P., M. Van Drielen, and B. Kankam. 2002. Avifaunal collapse in West African forest  
262 fragments. *Conservation Biology* **16**:1097-1111.

- 263 BirdLife International. 2001. Threatened birds of Asia: the BirdLife International Red Data Book.  
264 BirdLife International, UK.
- 265 Brawn, J., J. Karr, and J. Nichols. 1995. Demography of birds in a neotropical forest: effects of  
266 allometry, taxonomy, and ecology. *Ecology* **76**:41-51.
- 267 Brawn, J., J. Karr, J. Nichols, and W. Robinson. 1999. Demography of forest birds in Panama:  
268 how do transients affect estimates of survival rates? Pages 297-305 *in* Proceedings of the  
269 International Ornithological Conference
- 270 Caner, L., D. Seen, Y. Gunnell, B. Ramesh, and G. Bourgeon. 2007. Spatial heterogeneity of  
271 land cover response to climatic change in the Nilgiri highlands (southern India) since the  
272 Last Glacial Maximum. *The Holocene* **17**:195-205.
- 273 Diamond, J., K. Bishop, and S. Balen. 1987. Bird survival in an isolated Javan woodland: island  
274 or mirror? *Conservation Biology* **1**:132-142.
- 275 Donald, P. F. 2007. Adult sex ratios in wild bird populations. *Ibis* **149**:671-692.
- 276 Dooley Jr, J. and M. Bowers. 1998. Demographic responses to habitat fragmentation:  
277 experimental tests at the landscape and patch scale. *Ecology* **79**:969-980.
- 278 Gibbs, J. 1991. Avian nest predation in tropical wet forest: an experimental study. *Oikos* **60**:155-  
279 161.
- 280 Githiru, M. and L. Lens. 2006a. Annual survival and turnover rates of an Afrotropical robin in a  
281 fragmented forest. *Biodiversity and Conservation* **15**:3315-3327.
- 282 Githiru, M. and L. Lens. 2006b. Demography of an Afrotropical passerine in a highly  
283 fragmented landscape. *Animal Conservation* **9**:21-27.
- 284 Griffiths, R., M. C. Double, K. Orr, and R. J. G. Dawson. 1998. A DNA test to sex most birds.  
285 *Molecular Ecology* **7**:1071-1075.

- 286 Irwin, M., S. Johnson, and P. Wright. 2005. The state of lemur conservation in south-eastern  
287 Madagascar: population and habitat assessments for diurnal and cathemeral lemurs using  
288 surveys, satellite imagery and GIS. *Oryx* **39**:204-218.
- 289 Johnston, J., S. White, W. Peach, and R. Gregory. 1997. Survival rates of tropical and temperate  
290 passerines: a Trinidadian perspective. *The American Naturalist* **150**:771-789.
- 291 Karr, J., J. Nichols, M. Klimkiewicz, and J. Brawn. 1990. Survival rates of birds of tropical and  
292 temperate forests: will the dogma survive? *The American Naturalist*:277-291.
- 293 Kendall, W. L., J. D. Nichols, and J. E. Hines. 1997. Estimating temporary emigration using  
294 capture-recapture data with Pollock's robust design. *Ecology* **78**:563-578.
- 295 Kendall, W. L., K. H. Pollock, and C. Brownie. 1995. A likelihood-based approach to capture-  
296 recapture estimation of demographic parameters under the robust design. *Biometrics*  
297 **51**:293-308.
- 298 Morton, E. and B. Stutchbury. 2000. Demography and reproductive success in the Dusky  
299 Antbird, a sedentary tropical passerine. *Journal of Field Ornithology* **71**:493-500.
- 300 Perret, N., R. Pradel, C. Miaud, O. Grolet, and P. Joly. 2003. Transience, dispersal and survival  
301 rates in newt patchy populations. *Journal of Animal Ecology* **72**:567-575.
- 302 Pledger, S. 2000. Unified maximum likelihood estimates for closed capture, recapture models  
303 using mixtures. *Biometrics* **56**:434-442.
- 304 Pollock, K. 1982. A capture-recapture design robust to unequal probability of capture. *The*  
305 *Journal of Wildlife Management* **46**:752-757.
- 306 Raman, T. and R. Sukumar. 2002. Responses of tropical rainforest birds to abandoned  
307 plantations, edges and logged forest in the Western Ghats, India. *Animal Conservation*  
308 **5**:201-216.

- 309 Robin, V., A. Sinha, and U. Ramakrishnan. 2011. Determining the sex of a monomorphic,  
310 threatened, endemic passerine in the sky islands of southern India using molecular and  
311 morphometric methods. *Current Science* **101**:676-679.
- 312 Robin, V. V., A. Sinha, and U. Ramakrishnan. 2010. Ancient geographical gaps and paleo-  
313 climate shape the phylogeography of an endemic bird in the sky islands of southern India.  
314 *PLoS ONE* **5**:e13321.
- 315 Robin, V. V. and R. Sukumar. 2002. Status and habitat preference of White-bellied Shortwing  
316 *Brachypteryx major* in the Western Ghats (Kerala and Tamilnadu), India. *Bird*  
317 *Conservation International* **12**:335-351.
- 318 Sekercioglu, C., P. Ehrlich, G. Daily, D. Aygen, D. Goehring, and R. Sandi. 2002.  
319 Disappearance of insectivorous birds from tropical forest fragments. *Proceedings of the*  
320 *National Academy of Sciences USA* **99**:263-267.
- 321 Shanker, K. and R. Sukumar. 1998. Community structure and demography of small-mammal  
322 populations in insular montane forests in southern India. *Oecologia* **116**:243-251.
- 323 Sridhar, H. 2005. Patterns in mixed-species flocking of birds in rainforest fragments of southern  
324 Western Ghats. M.Sc. Saurashtra University, Rajkot, Dehradun, India.
- 325 Team, R. D. C. 2011. A language and environment for statistical computing. R Foundation for  
326 Statistical Computing, Vienna, Austria. ISBN 3-900051-07-0, URL [http://www.R-](http://www.R-project.org/)  
327 [project.org/](http://www.R-project.org/). Vienna, Austria.
- 328 Thiollay, J. 1999. Responses of an avian community to rain forest degradation. *Biodiversity and*  
329 *Conservation* **8**:513-534.
- 330 White, G. and K. Burnham. 1999. Program MARK: survival estimation from populations of  
331 marked animals. *Bird Study* **46**:120-138.

- 332 Wilson, K. R. and D. R. Anderson. 1985. Evaluation of two density estimators of small mammal  
333 population size. *Journal of Mammalogy* **66**:13-21.
- 334 Zanette, L. 2001. Indicators of habitat quality and the reproductive output of a forest songbird in  
335 small and large fragments. *Journal of Avian Biology* **32**:38-46.
- 336 Zanette, L., P. Doyle, and S. Tremont. 2000. Food shortage in small fragments: evidence from an  
337 area-sensitive passerine. *Ecology* **81**:1654-1666.
- 338
- 339
- 340



341 **Figure legends**

342 Figure 1: Density of shortwings (number of individuals per ha) in plots across disturbance

343 categories and patch size. Error bars represent SE from yearly variation in density.

344 Figure 2: Survival rate of shortwings (expected proportion of individuals that survive and do not

345 permanently emigrate from one sampling year to the next) in plots across disturbance categories

346 and patch size. Note that the plots are aligned along a disturbance gradient, with Plot A being the

347 most disturbed and Plots D to H are undisturbed.

348 Figure 3: Mean Adult Sex Ratio - Proportion of females in plots. S indicates a sum of all small

349 plots (E to H). Plot A is the most disturbed plot. The error bars indicate standard error across

350 multiple years.

351

352 Figure 1:

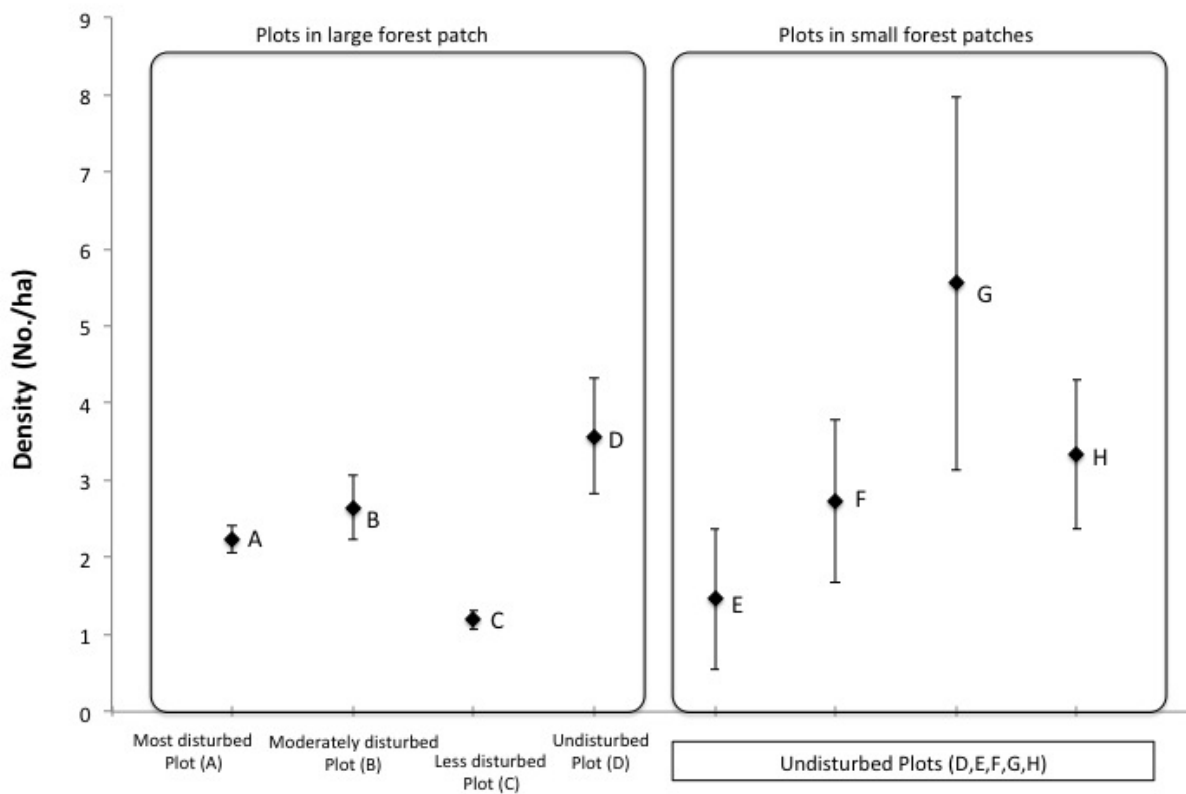

353

354

355 Figure 2:

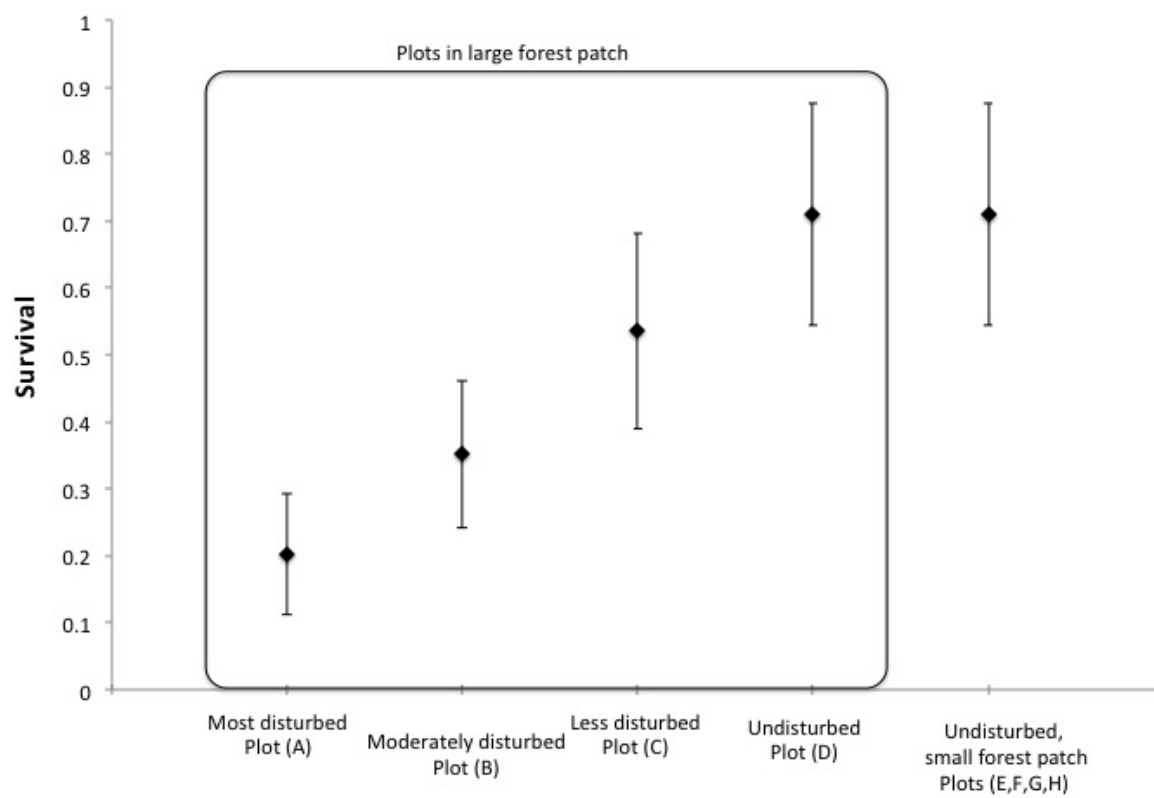

356  
357

358 Figure 3:

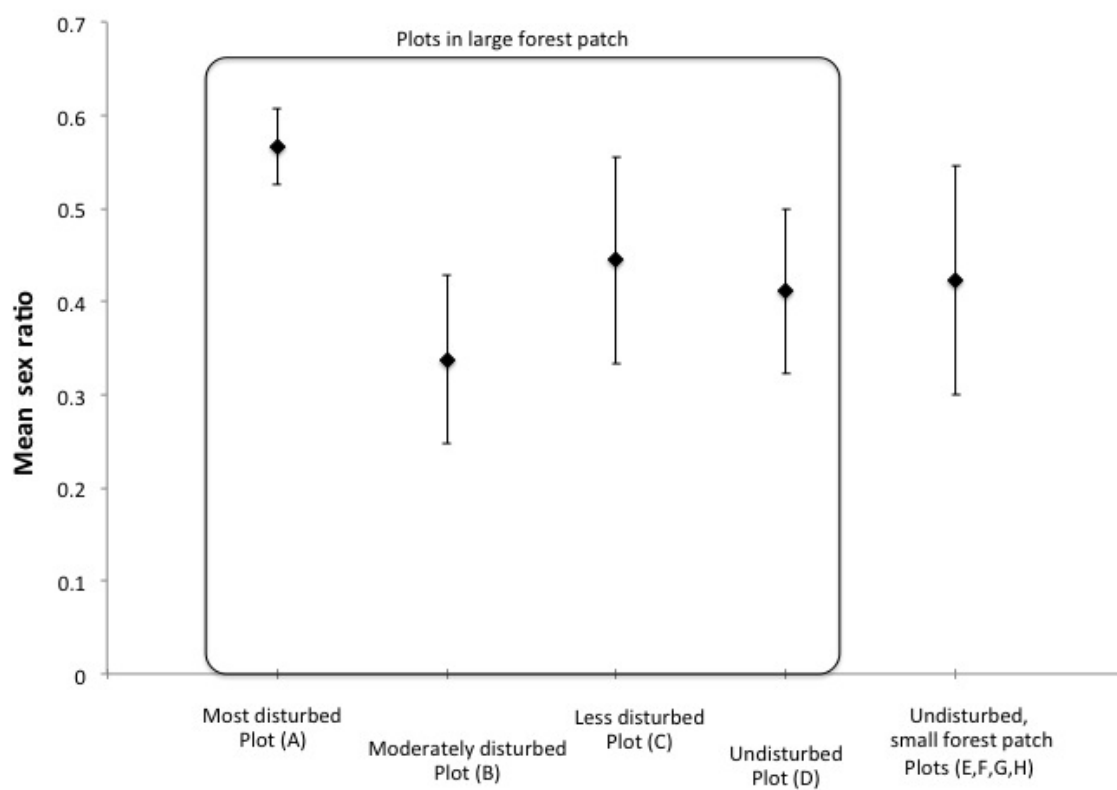

359  
360  
361
